# Supplementary material for: Konjac glucomannan-templated synthesis of three-dimensional NiO nanostructures assembled from porous NiO nanoplates for gas sensors
Source: Royal Society of Chemistry journal article supplement (doi:10.1039/c9ra00285e), 2019-01-01

## **Electronic Supplementary information (ESI)**

**Fig. S1.** Design of a gas sensor by drop-cast of an ethanol dispersion of Ni-KGM composites on an interdigitated Pt electrode substrate followed by heating under air to form a porous NiO nanoplate layer-deposited electrode, (b) Photo of gas testing chamber for gas sensing measurement, and (c) Diagram of the working system of gas sensor.

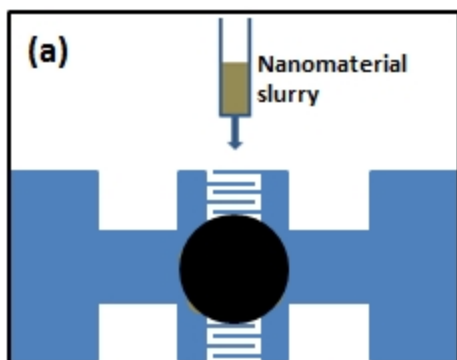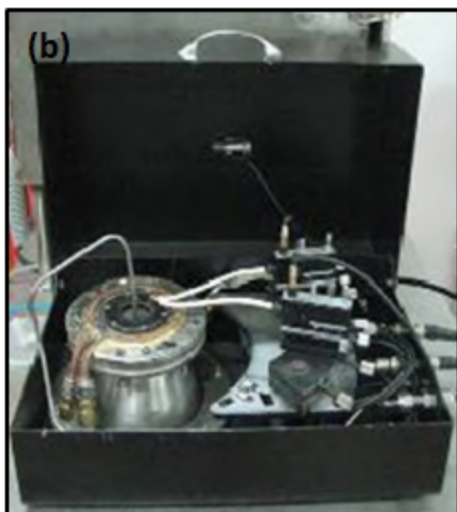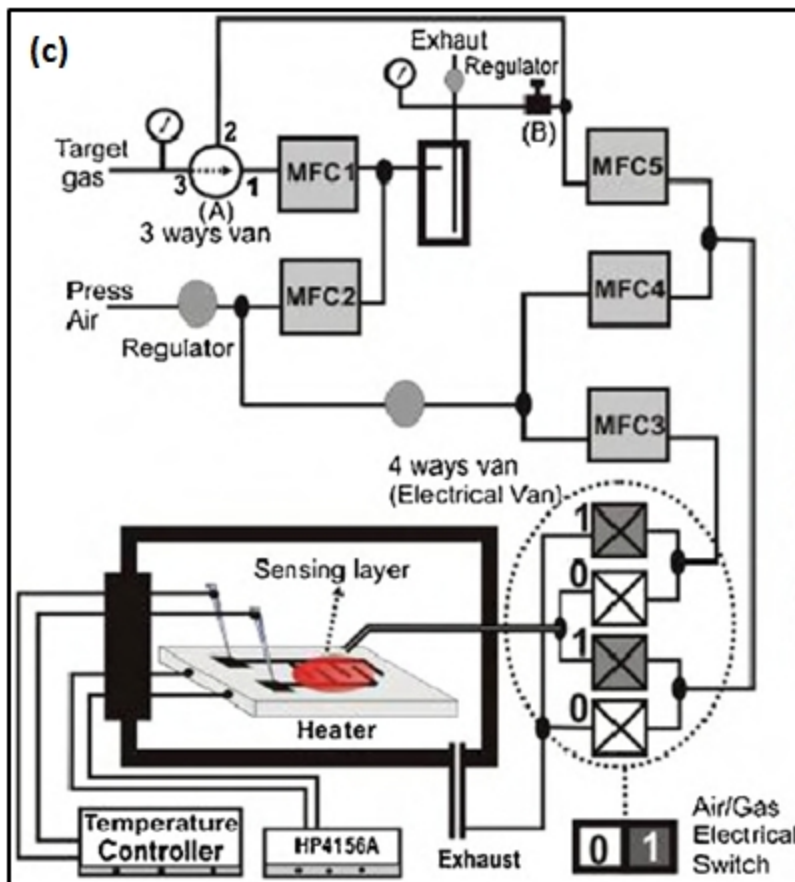

**Fig. S2.** Low magnification SEM image of konjac glucomannan (a) and high magnification SEM image of porous NiO nanoplates.

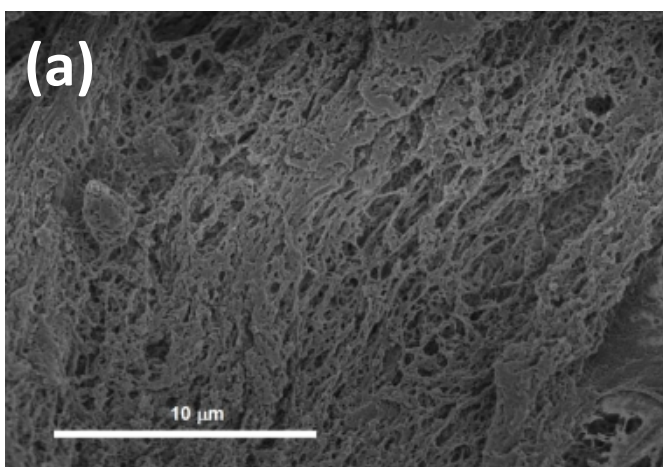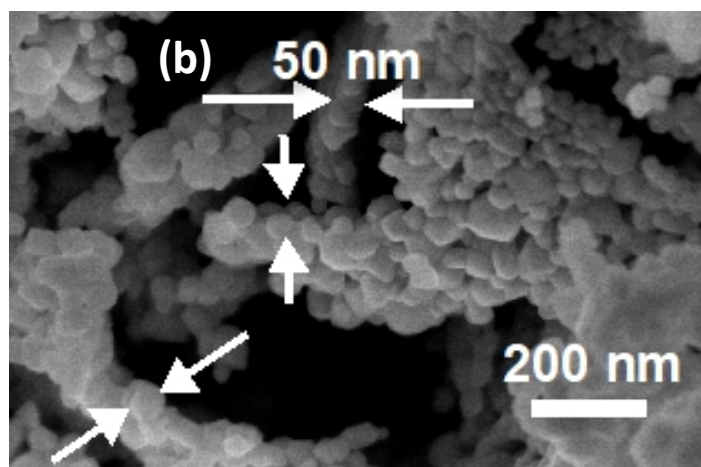

**Fig. S3.** Photograph of Ni-KGM composites.

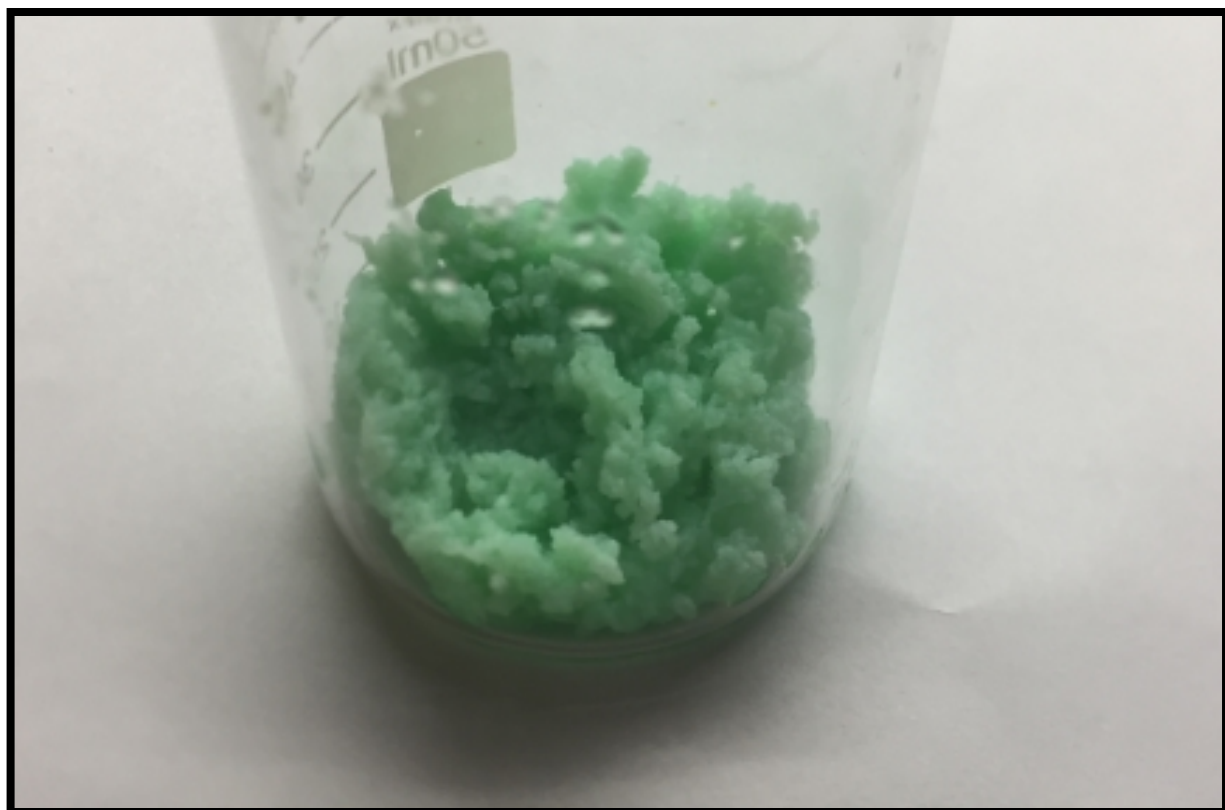

**Fig. S4.** XRD pattern of KGM.

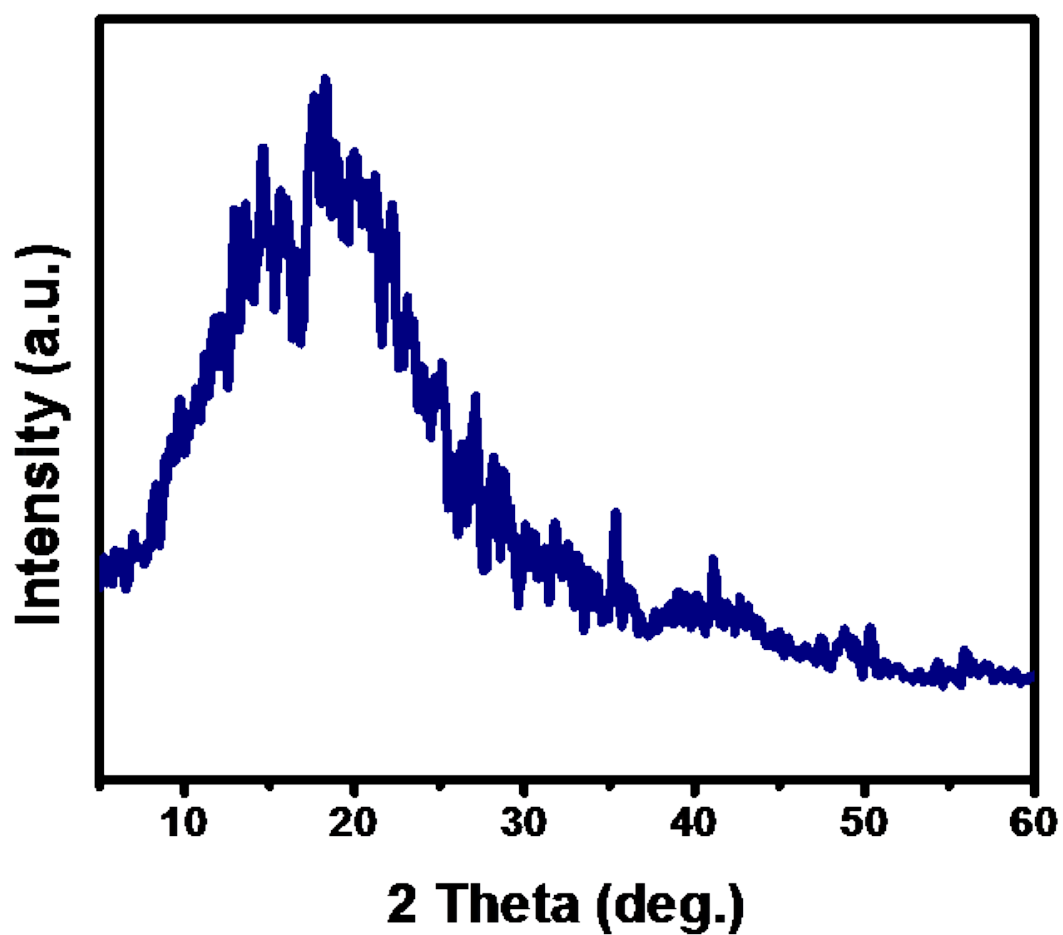

**Fig. S5.** Response and recovery times of the NiO nanoplate sensors toward 1 ppm of H<sub>2</sub>S (b) and recovery times of the NiO nanoplate sensors toward higher concentrations of H<sub>2</sub>S (b) at optimum temperature.

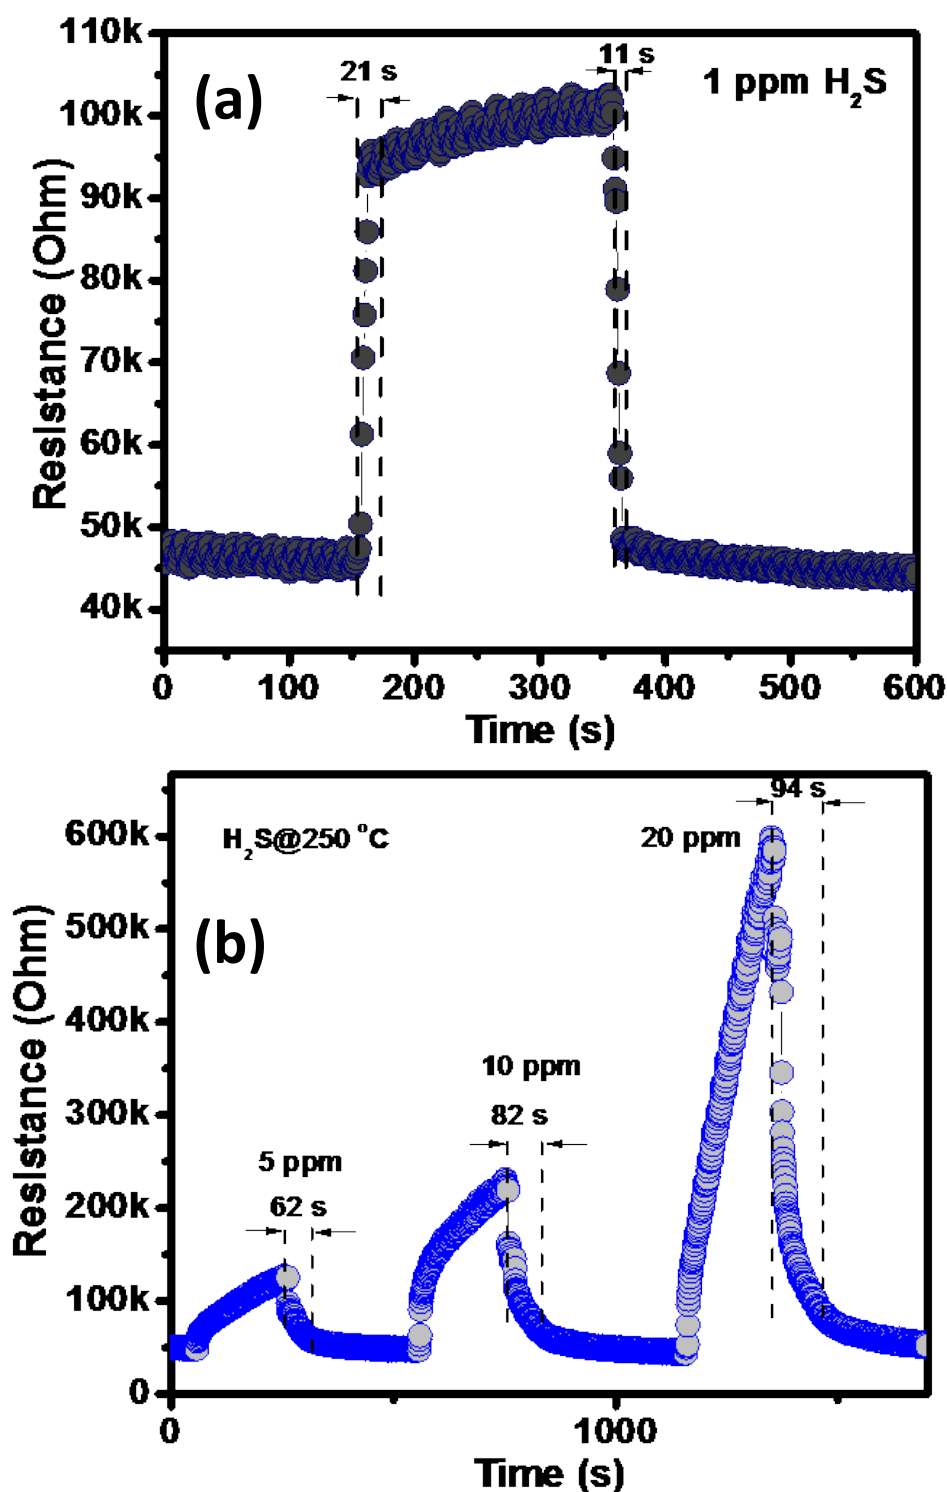

Supplement: c9ra00285e1.pdf [file c9ra00285e1.pdf]
